# Supplementary material for: Cancer Incidence Trend in the Hebei Spirit Oil Spill Area, from 1999 to 2014: An Ecological Study
Source: PubMed Central journal article supplement (PMC5982045; doi:10.3390/ijerph15051006), 2018-05-17
Supplement: ijerph-15-01006-s001.pdf [file ijerph-15-01006-s001.pdf]

Table S1. Age-standardized incidence rate of five major cancer in Korea and coastal areas, 1999-2014.

| Cancer type                                  | Korea nationwide |                             | Coastal areas |                             |
|----------------------------------------------|------------------|-----------------------------|---------------|-----------------------------|
|                                              | Case             | Standardized incidence rate | Case          | Standardized incidence rate |
| Male                                         |                  |                             |               |                             |
| All cancer (C00-C96)                         |                  |                             |               |                             |
| 1999-2003                                    | 313,555          | 291.0                       | 3,178         | 314.3                       |
| 2004-2008                                    | 419,518          | 317.3                       | 3,629         | 344.5                       |
| 2009-2014                                    | 659,644          | 330.5                       | 4,892         | 350.2                       |
| All cancer (C00-C96) excluding thyroid (C73) |                  |                             |               |                             |
| 1999-2003                                    | 310,173          | 288.1                       | 3,155         | 311.2                       |
| 2004-2008                                    | 406,467          | 307.5                       | 3,570         | 335.8                       |
| 2009-2014                                    | 618,132          | 306.8                       | 4,737         | 329.4                       |
| Stomach (C16)                                |                  |                             |               |                             |
| 1999-2003                                    | 73,343           | 67.7                        | 770           | 76.0                        |
| 2004-2008                                    | 87,742           | 65.7                        | 775           | 72.6                        |
| 2009-2014                                    | 123,619          | 60.8                        | 895           | 63.7                        |
| Lung (C33-C34)                               |                  |                             |               |                             |
| 1999-2003                                    | 52,196           | 50.6                        | 649           | 59.6                        |
| 2004-2008                                    | 63,977           | 49.2                        | 700           | 58.2                        |
| 2009-2014                                    | 93,284           | 45.4                        | 870           | 50.8                        |
| Colon (C18-C20)                              |                  |                             |               |                             |
| 1999-2003                                    | 33,479           | 31.0                        | 269           | 26.3                        |
| 2004-2008                                    | 58,411           | 43.8                        | 381           | 35.5                        |
| 2009-2014                                    | 99,508           | 49.1                        | 642           | 46.4                        |
| Liver (C22)                                  |                  |                             |               |                             |
| 1999-2003                                    | 51,452           | 45.9                        | 486           | 51.8                        |
| 2004-2008                                    | 57,142           | 41.9                        | 505           | 52.7                        |
| 2009-2014                                    | 73,054           | 35.6                        | 596           | 45.9                        |
| Prostate (C61)                               |                  |                             |               |                             |
| 1999-2003                                    | 9,228            | 9.5                         | 92            | 7.7                         |
| 2004-2008                                    | 23,825           | 18.6                        | 208           | 15.7                        |
| 2009-2014                                    | 53,441           | 26.0                        | 434           | 24.3                        |
| Leukemia (C91-C95)                           |                  |                             |               |                             |
| 1999-2003                                    | 6,041            | 5.3                         | 44            | 5.8                         |
| 2004-2008                                    | 6,826            | 5.5                         | 41            | 7.1                         |
| 2009-2014                                    | 9,799            | 5.8                         | 54            | 4.9                         |
| Female                                       |                  |                             |               |                             |
| All cancer (C00-C96)                         |                  |                             |               |                             |
| 1999-2003                                    | 243,297          | 181.2                       | 1,849         | 166.4                       |
| 2004-2008                                    | 366,747          | 238.8                       | 2,492         | 228.9                       |
| 2009-2014                                    | 636,552          | 304.3                       | 3,599         | 296.6                       |
| All cancer (C00-C96) excluding thyroid (C73) |                  |                             |               |                             |

|                    |         |       |       |       |
|--------------------|---------|-------|-------|-------|
| 1999-2003          | 222,681 | 164.5 | 1,707 | 146.4 |
| 2004-2008          | 291,858 | 183.9 | 2,104 | 171.6 |
| 2009-2014          | 449,413 | 198.6 | 2,828 | 183.6 |
| Thyroid (C73)      |         |       |       |       |
| 1999-2003          | 20,616  | 16.7  | 142   | 20.0  |
| 2004-2008          | 74,889  | 54.9  | 388   | 57.3  |
| 2009-2014          | 187,139 | 105.7 | 771   | 112.9 |
| Breast (C50)       |         |       |       |       |
| 1999-2003          | 35,168  | 28.3  | 130   | 18.2  |
| 2004-2008          | 54,987  | 38.6  | 194   | 29.1  |
| 2009-2014          | 96,581  | 49.9  | 302   | 33.7  |
| Colon (C18-C20)    |         |       |       |       |
| 1999-2003          | 26,051  | 18.6  | 210   | 16.1  |
| 2004-2008          | 40,800  | 24.4  | 328   | 24.3  |
| 2009-2014          | 65,382  | 26.4  | 438   | 24.6  |
| Stomach (C16)      |         |       |       |       |
| 1999-2003          | 38,186  | 27.5  | 359   | 26.7  |
| 2004-2008          | 43,909  | 26.9  | 377   | 28.4  |
| 2009-2014          | 60,266  | 25.3  | 496   | 27.7  |
| Lung (C33-C34)     |         |       |       |       |
| 1999-2003          | 18,640  | 12.6  | 192   | 12.7  |
| 2004-2008          | 24,952  | 13.9  | 201   | 10.7  |
| 2009-2014          | 40,039  | 15.0  | 297   | 13.3  |
| Leukemia (C91-C95) |         |       |       |       |
| 1999-2003          | 4,819   | 3.8   | 26    | 3.3   |
| 2004-2008          | 5,394   | 4.0   | 35    | 5.1   |
| 2009-2014          | 7,522   | 4.1   | 43    | 3.9   |

---
